# Supplementary material for: Lactose-Induced Chronic Diarrhea Results From Abnormal Luminal Microbial Fermentation and Disorder of Ion Transport in the Colon
Source: Front Physiol. 2020 Jul 29;11:877. doi: 10.3389/fphys.2020.00877 (PMC7403511; doi:10.3389/fphys.2020.00877)
Supplement: TABLE S1 — Antibodies for western and immunofluorescence. [file Table_1.XLS]

## Sheet: A-B.test
X	C1	C2	C3	C4	C5	C6	C7	I1	I2	I3	I4	I5	I6	I7	p.value
p__Tenericutes	0.00538001	0.00208027	0.00200854	0.000358667	0.000394534	0.0031204	0.000681468	0	0	0	0	0	0	0	0.00105758
p__Cyanobacteria	7.17334e-05	7.17334e-05	3.58667e-05	3.58667e-05	0.000358667	0.0002152	7.17334e-05	0	0	0	0	0	0	0	0.000982614
p__Saccharibacteria	0.00179334	0	0.0030128	0	0	3.58667e-05	0	0	0	0	0	0	0	0	0.0754126
p__Firmicutes	0.748467	0.879667	0.938704	0.885226	0.556938	0.821133	0.798357	0.862415	0.996736	0.874359	0.926473	0.936731	0.914996	0.945052	0.0530303
p__Deinococcus-Thermus	0	0	0	0	0	0	0	0	0	3.58667e-05	3.58667e-05	0	0	0	0.171682
p__Actinobacteria	0.0143826	0.0194398	0.0153868	0.0192604	0.00132707	0.0137728	0.0143467	0.00964815	0.0015064	0.0180051	0.0358667	0.00803415	0.0103655	0.0164987	0.710373
p__Euryarchaeota	0	0	0	0	0	0	0	0	0	0	0	0	0	0	NA
p__Chloroflexi	0	0	0	0	0	0	0	0	0	0	0	0	0	0	NA
p__Bacteroidetes	0.221513	0.0860084	0.0373014	0.047631	0.435565	0.147125	0.166063	0.0001076	0	0.00168574	0	0	3.58667e-05	7.17334e-05	0.00206878
p__unidentified	0	0	0	0	3.58667e-05	0	0	0	0	0	0	0	0	0	0.391366
p__Elusimicrobia	0	0	0	3.58667e-05	0.00104013	0	0	0	0	0	0	0	0	0	0.172955
p__Verrucomicrobia	0.00419641	0.000609734	0	0.0469495	0	0.000753201	0.0175388	0.0002152	0	0	0	0	0	0	0.0235711
p__Proteobacteria	0.00419641	0.012123	0.00355081	0.000502134	0.00433987	0.0138446	0.00294107	0.127614	0.00175747	0.105914	0.0376242	0.0552347	0.0746028	0.0383774	0.0174825
g__Clostridium_innocuum_group	0	0	0	0	0	0	0	0	0	0	0	0	0	0	NA
g__Coprococcus_1	0.00936121	0.00125534	0.0025824	0.000251067	0.00251067	0.00100427	0.000573868	0	0	0	0	0	0	0	0.00105758
g__Flavonifractor	0	0	0	0	0	0	0	0	0	0	0	0	3.58667e-05	0	0.391366
g__Anaerofustis	0.0001076	0.000251067	0.000358667	0.000179334	3.58667e-05	0.000179334	0.000179334	0	0	0	0	0	0	0	0.000997312
g__Collinsella	0	0	0	0	0	0	0	0	0	0	0	0	0	0	NA
g__Oscillibacter	7.17334e-05	3.58667e-05	0.0002152	0.0001076	0.00649188	0.000394534	0.0001076	0	0	0	0	0	0	0	0.00104229
g__Pediococcus	0	0	0	0	0	0	0	0	0	0	0	0	0	0	NA
g__Eubacterium	0	0	0	3.58667e-05	0	0	0	3.58667e-05	0	0	0	0	0	0	1
g__Alloprevotella	0.000143467	0.000609734	0	7.17334e-05	0.0220222	0.00695814	0.0003228	0	0	0	0	0	0	0	0.00372197
g__Family_XIII_AD3011_group	3.58667e-05	0.000358667	0.0002152	0.000394534	0.000609734	0.0003228	0.000286934	0	0	0	0	0	0	0	0.00105758
g__unidentified	0.195976	0.194792	0.132276	0.163122	0.219253	0.19967	0.23776	0.000502134	0.000538001	0.00297694	0.000968401	0.000609734	0.000717334	0.000394534	0.000582751
g__Acinetobacter	0	0	0	0	0	0	0	0.00125534	0	0.000753201	7.17334e-05	0	0	0	0.0754126
g__Erysipelatoclostridium	0.000251067	0.000502134	0	0.000394534	0	0.000466267	0.000466267	0	0	0	0	0	0	0	0.0112353
g__Christensenellaceae_R-7_group	0.000538001	0.00114774	0.00315627	0.00376601	0.000753201	0.00251067	0.00423227	0	0	0	0	0	0	0	0.00105758
g__Ruminococcaceae_NK4A214_group	0.0002152	0.0002152	0.0155303	0.00147054	0.00756788	0.000789068	0.0029052	0	0	0	0	0	0	0	0.00104229
g__Turicibacter	0.0002152	7.17334e-05	0.0001076	0.0002152	0	3.58667e-05	0	3.58667e-05	0	0	0	0	0	0	0.0278614
g__Romboutsia	0.000824935	0.000143467	0	0.000179334	0	3.58667e-05	7.17334e-05	3.58667e-05	0.000179334	0.00100427	0.000286934	0.00175747	0.00136294	0.0003228	0.0402496
g__Senegalimassilia	0.0001076	3.58667e-05	0.0001076	0.000143467	3.58667e-05	0	0	0	0	0	0	0	0	0	0.0111139
g__Alistipes	0.0682902	0.00821348	0.000824935	0.00186507	0.000358667	0.0214124	0.0123382	0	0	0	0	0	3.58667e-05	0	0.00141376
g__Eubacterium_xylanophilum_group	0.000860801	0.0585345	0.0376959	0.00157814	0.0132348	0.0283347	0.000860801	0	0	0	0	0	0	0	0.00104229
g__Bifidobacterium	3.58667e-05	7.17334e-05	0	3.58667e-05	3.58667e-05	3.58667e-05	0	0.00720921	0.00100427	0.0132707	0.034181	0.00283347	0.00390947	0.015889	0.0019069
g__Pasteurella	0	0.0001076	0	0	0	0.0001076	3.58667e-05	0	0	0	0.000143467	3.58667e-05	0	0.000179334	0.83146
g__Butyricimonas	0.000824935	0.000394534	7.17334e-05	0.0002152	0	0.000645601	0.000286934	0	0	0	0	0	0	0	0.00372197
g__Enterorhabdus	0.00749614	0.0148488	0.00362254	0.0107959	7.17334e-05	0.00710161	0.00753201	0	0	0	0	0	0	0	0.00105758
g__Barnesiella	0	0	3.58667e-05	0.000179334	0	3.58667e-05	0.000394534	0	0	0	0	0	0	0	0.0304337
g__Macrococcus	0	0	0	0	0	0	0	0	0	0.000286934	3.58667e-05	0	0	7.17334e-05	0.0754126
g__Eubacterium_fissicatena_group	0.0002152	0.0001076	0	0.000394534	0	3.58667e-05	0.000573868	0	0	0	0	0	0	0	0.0113573
g__Lachnospiraceae_FCS020_group	7.17334e-05	0.000753201	0.000681468	0.000286934	0.0003228	0.000573868	0.000466267	0	0	0	0	0	0	0	0.00105758
g__Dietzia	0	0	0	0	0	0	0	0	0	0	0	0	0	0	NA
g__Aerococcus	0	0.000143467	0	0	0	0.0003228	0	0	0	0	0	0	0	0	0.172955
g__Eubacterium_nodatum_group	0.000358667	0.000860801	0.000466267	0.00111187	0.000466267	0.00100427	0.00175747	0	0	0	0	0	0	0	0.00104229
g__Hungatella	0	0	0	0	0	0	0	0	0	0	0	0	0	0	NA
g__Enterococcus	0.000824935	0.000430401	0.000143467	0.0002152	0	0.000609734	3.58667e-05	0.0027976	0.00265414	0.0123382	0.0167139	0.00344321	0.00509307	0.00778308	0.000582751
g__Lachnospiraceae_UCG-010	0	3.58667e-05	3.58667e-05	7.17334e-05	0.000609734	0	0	0	0	0	0	0	0	0	0.0304337
g__Ruminococcus_1	0.00337147	0.019655	0.000932535	0.0136652	0.0294107	0.0421793	0.0224884	0	0	0	0	0	0	0	0.00105758
g__Helicobacter	0	0	0	0	0.00168574	0	0	0	0.000251067	0	0	0.0002152	0	0	0.722148
g__Family_XIII_UCG-001	0.00233134	0.00179334	0.000932535	0.0017216	0.000251067	0.000860801	0.00154227	0	0	0	0	0	0	0	0.00105758
g__Erysipelotrichaceae_UCG-003	0	0.000251067	0	0.0001076	3.58667e-05	0.000286934	7.17334e-05	0	0	0	0	0	0	0	0.0113573
g__Parvibacter	0.0001076	0.0003228	3.58667e-05	0.000538001	0	0.000502134	0.000430401	0	0	0	0	0	0	0	0.00372197
g__Faecalitalea	0	0.000143467	7.17334e-05	0	0	7.17334e-05	0	0	0	0	0	0	0	0	0.0747914
g__uncultured	0	0	0	0	7.17334e-05	0	3.58667e-05	0	0	0	0	0	0	0	0.172955
g__Klebsiella	0	0	0	0	0	0	0	3.58667e-05	0	0.00469854	7.17334e-05	0	3.58667e-05	0	0.0304337
g__Paracoccus	0	0	0	0	0	0	0	0	0	3.58667e-05	3.58667e-05	0	3.58667e-05	0	0.0729291
g__Ruminococcus_gnavus_group	0	0	0	0	0	0	0	0	0.0012912	7.17334e-05	0	0.000681468	0.0012912	3.58667e-05	0.0112353
g__Aeromonas	0	0	0	0	0	0	0	7.17334e-05	0	0	0	0	0	0	0.391366
g__Ruminococcaceae_UCG-005	0.0428966	0.0416771	0.0849324	0.0570998	0.000932535	0.0591801	0.0559879	0	0	0	0	0	0	0	0.00105758
g__Morganella	0	0.0001076	0	3.58667e-05	0	0	0	0	0	0	0	0	0	0	0.172955
g__Acetanaerobacterium	0	0	0	0	0	0	0	0	0	0	0	0	0	0	NA
g__Tyzzerella_4	0	0	0	0.000394534	0.000430401	0	0.000860801	0	0	0	0	0	0	0	0.0754126
g__Gemmobacter	0	0	0	0	0	0	0	0.000143467	0	0	0	0	0	0	0.391366
g__Jeotgalicoccus	0	7.17334e-05	0	0	0	0.0001076	0.0001076	0	0	0	0	0	0	0	0.0747914
g__Anaerovorax	0	7.17334e-05	7.17334e-05	0	0.000538001	0.000143467	0	0	0	0	0	0	0	0	0.0304337
g__Clostridium_sensu_stricto_1	3.58667e-05	0	0	3.58667e-05	0	0.0001076	7.17334e-05	0.0001076	0	0	0	0.00132707	0.0011836	0	0.837426
g__Eubacterium_ventriosum_group	0.00398121	0.0112621	3.58667e-05	0.00778308	0.0002152	0.012123	0.00670708	0	0	0	0	0	0	0	0.00105758
g__Blastococcus	0	0	0	0	0	0	0	0	0	0	0	0	0	0	NA
g__Ruminococcaceae_UCG-010	3.58667e-05	0.000143467	3.58667e-05	3.58667e-05	0	0.000502134	7.17334e-05	0	0	0	0	0	0	0	0.00353895
g__Coprococcus_3	0	0.000251067	0	0.0001076	0.00620494	0.000358667	0.000143467	0	0	0	0	0	0	0	0.0113573
g__Ruminiclostridium_1	7.17334e-05	0	0	0	0	3.58667e-05	0	0	0	0	0	0	0	0	0.172955
g__Blautia	0.0030128	0.0015064	0.00179334	0.0100068	0.0459453	0.00261827	0.0101503	3.58667e-05	0	7.17334e-05	0	0	0	0	0.00171087
g__Tyzzerella	0.000143467	0.000824935	7.17334e-05	0.000932535	0.0001076	0.000968401	0.0013988	0	0	0	0	0	0	0	0.00105758
g__Bilophila	0	0	0	0	3.58667e-05	0	0	0	0	0	0	0	0	0	0.391366
g__Lachnospiraceae_ND3007_group	0	0	0	0	0	0	0	0	0	0	0	0	0	0	NA
g__Deinococcus	0	0	0	0	0	0	0	0	0	3.58667e-05	3.58667e-05	0	0	0	0.171682
g__Micrococcus	0	0	0	0	0	0	0	0	0	0.000358667	3.58667e-05	0	0	0	0.172955
g__Corynebacterium	3.58667e-05	0.0001076	0	0.000179334	0	0.0002152	3.58667e-05	0	3.58667e-05	0.0001076	7.17334e-05	3.58667e-05	0.0001076	7.17334e-05	1
g__Anaerotruncus	0.0022596	0.00197267	0.00100427	0.000860801	0.00243894	0.0033356	0.00157814	0	0	0	0	0	0	0	0.00105758
g__Citrobacter	0	0.000179334	0	0	0	0.0003228	0	0.00100427	3.58667e-05	0.000645601	0.0001076	0.000143467	7.17334e-05	0.0001076	0.0670078
g__Faecalibaculum	3.58667e-05	7.17334e-05	3.58667e-05	0.000179334	0	0.0001076	0.000143467	7.17334e-05	0	0.000143467	0	0	0	0	0.0952406
g__Delftia	0	0	0	0	0	3.58667e-05	0	0	0	0	0	0	0	0	0.391366
g__Globicatella	3.58667e-05	7.17334e-05	0	0	0	7.17334e-05	0	0	0	3.58667e-05	3.58667e-05	0	3.58667e-05	3.58667e-05	1
g__Sutterella	0	0	0	0	7.17334e-05	0	0	0	0	0	0	0	0	0	0.391366
g__Methanosphaera	0	0	0	0	0	0	0	0	0	0	0	0	0	0	NA
g__Lachnospiraceae_UCG-006	0.012912	0.00846455	0.014813	0.00903841	7.17334e-05	0.00405294	0.00842868	0	0	0	0	0	0	0	0.00105758
g__Corynebacterium_1	0.0002152	0.000789068	7.17334e-05	0.000860801	0	0.000932535	0.000609734	0	0	0	0	7.17334e-05	7.17334e-05	0	0.0134297
g__Adlercreutzia	0.00441161	0.000645601	0.000358667	0.00340734	0.000251067	0.000430401	0.00329974	3.58667e-05	0	0	0	0	0	0	0.00141376
g__Ruminococcus_torques_group	0	3.58667e-05	0	0.00132707	0.00208027	0	0.000932535	0	0	0	0	0	0	0	0.0307212
g__Parabacteroides	0.00516481	0.0002152	0.00190094	0.00114774	0.0022596	0.000681468	0.00229547	0	0	0	0	0	0	0	0.00105758
g__Megamonas	3.58667e-05	0	0.0001076	0.000860801	0.0127327	0	3.58667e-05	0.119616	0.73473	0.200029	0.148847	0.0233492	0.0487429	0.123238	0.00211656
g__Oligella	3.58667e-05	7.17334e-05	0	0	0	0	0	0	0	0	0	0	0	0	0.172955
g__Peptococcus	0	3.58667e-05	3.58667e-05	0	0.000251067	7.17334e-05	3.58667e-05	0	0	0	0	0	0	0	0.0108729
g__Eubacterium_oxidoreducens_group	0	3.58667e-05	0.0001076	0	0	0	0	0	0	0	0	0	0	0	0.172955
g__Ruminococcus_2	0.00702988	0.0425738	0.0254295	0.0419641	0.0283706	0.0405294	0.0357591	0	0	0	0	0	0	0	0.00105758
g__Koukoulia	0	0	0	0	3.58667e-05	0	0	0	0	0	0	0	0	0	0.391366
g__Aquamicrobium	0	0	0	0	0	0	0	0	0	0	0	0	0	0	NA
g__Candidatus_Saccharimonas	0.00179334	0	0.0030128	0	0	3.58667e-05	0	0	0	0	0	0	0	0	0.0754126
g__Lachnospiraceae_NC2004_group	0	0	0	0	0	0	0	0	0	0	0	0	0	0	NA
g__Ruminococcaceae_UCG-008	0	0	0	0	0.00229547	3.58667e-05	0	0	0	0	0	0	0	0	0.172955
g__Acetitomaculum	0	0	0	3.58667e-05	0.0412826	0	0	0	0	0	0	0	0	0	0.172955
g__Peptoclostridium	0	0	0	0	0	0	0	0	0	0	0	0	3.58667e-05	0	0.391366
g__Methanobrevibacter	0	0	0	0	0	0	0	0	0	0	0	0	0	0	NA
g__Butyrivibrio	0	0	0.0002152	0	0	0	0	0	0	0	0	0	0	0	0.391366
g__Bacteroides	0.0355081	0.00993508	0.00329974	0.00670708	0.00545174	0.0121947	0.0162835	0	0	0	0	0	0	3.58667e-05	0.00141376
g__Eubacterium_ruminantium_group	0.000143467	0.01076	0.0003228	0	0	0.0115491	0	0	0	0	0	0	0	0	0.0307212
g__Holdemania	0	3.58667e-05	0	0	0	3.58667e-05	0	0	0	0	0	0	0	0	0.171682
g__Empedobacter	0	0	0	0	0	0	0	7.17334e-05	0	3.58667e-05	0	0	0	0	0.172955
g__gut_metagenome	0	0	0	0	0.000430401	0	0	0	0	0	0	0	0	0	0.391366
g__Eubacterium_coprostanoligenes_group	0.0176823	0.0243894	0.0288727	0.0238514	0.00932535	0.0457659	0.0153151	0	0	0	0	0	0	0	0.00105758
g__Phascolarctobacterium	0	0	0	0	0.0362971	0	0	0.000717334	0.00269	0.000251067	0.000502134	3.58667e-05	0.000143467	0.000286934	0.0237669
g__Intestinimonas	0.00272587	0.003228	0.00534414	0.00286934	0.00548761	0.00315627	0.00380187	0	0	0	0	0	0	0	0.00105758
g__Akkermansia	0.00419641	0.000609734	0	0.0469495	0	0.000753201	0.0175388	0.0002152	0	0	0	0	0	0	0.0235711
g__Enhydrobacter	0	0	0	0	0	0	0	0.000286934	0.000143467	0.000932535	0.000394534	3.58667e-05	7.17334e-05	0.0001076	0.00105758
g__Prevotellaceae_Ga6A1_group	0	0	0	0	0.00337147	0	0	0	0	0	0	0	0	0	0.391366
g__Georgenia	0	0	0	0	0	0	0	0	0	0	0	0	0	0	NA
g__Eubacterium_hallii_group	0	0	3.58667e-05	0	0.001076	0	0	0	0	0	0	0	0	0	0.172955
g__Ruminiclostridium_6	0.0362613	0.00132707	0.00168574	0.0923209	0.00900255	0.000860801	0.0704422	0	0	0	0	0	0	0	0.00105758
g__Streptococcus	0.000645601	0.000860801	0.000286934	0.000179334	0.000251067	0.0018292	0.000358667	0.000681468	0.000430401	0.00211614	0.00100427	0.000286934	0.000645601	0.000358667	0.336306
g__Eisenbergiella	0	0.000753201	0.000179334	3.58667e-05	0.000179334	0.0003228	3.58667e-05	0	0	0	0	0	0	0	0.00362978
g__Gemella	0	0	0	0	0	0	0	0.000179334	7.17334e-05	0	7.17334e-05	7.17334e-05	0.0001076	7.17334e-05	0.00327456
g__Ruminococcaceae_UCG-004	0.000179334	0.000179334	0	3.58667e-05	0.000286934	0.000466267	0.000932535	0	0	0	0	0	0	0	0.00367571
g__Oscillospira	0.0002152	0.000286934	0.0001076	0.000179334	0.0024748	0.000251067	0.000251067	0	0	0	0	0	0	0	0.00104229
g__Lachnospira	0	0	0	0	0.00254654	0	0	0	0	0	0	0	0	0	0.391366
g__Trichococcus	0	0	0	0	0	0	0	0.0001076	0	0.000466267	0	0	0	0	0.172955
g__Candidatus_Soleaferrea	0	3.58667e-05	0.0002152	7.17334e-05	0.000286934	0	0.0002152	0	0	0	0	0	0	0	0.0112353
g__Anaerostipes	0	0	0	0	0.00581041	0	0	0	0	0	0	0	0	0	0.391366
g__Lactobacillus	0.294932	0.210681	0.188121	0.333812	0.0194756	0.249166	0.238765	0.735698	0.254187	0.645422	0.757936	0.903554	0.853449	0.812202	0.002331
g__Catabacter	0	0	3.58667e-05	0	0.000251067	0	0	0	0	0	0	0	0	0	0.172955
g__Subdoligranulum	7.17334e-05	3.58667e-05	3.58667e-05	3.58667e-05	0.0002152	0	3.58667e-05	0	3.58667e-05	0	0	0	0	0	0.0117345
g__Haemophilus	0	0	0	0	0	3.58667e-05	0	0	0	0	0	0	0	0	0.391366
g__Epulopiscium	0	0	0	0	0	0	0	0	0	0	0	0	0	0	NA
g__Fusicatenibacter	0	0	0	3.58667e-05	0	0	0	0	0	0	0	0	0	0	0.391366
g__Lachnospiraceae_UCG-001	0.0001076	0.0001076	0.000717334	0	0.001614	0.000430401	0	0	0	0	0	0	0	0	0.0112353
g__Prevotellaceae_NK3B31_group	0.000860801	0.00304867	0.000286934	0.00111187	0.0370145	0.0225243	0.00566694	0	0	0	0	0	0	0	0.00105758
g__Escherichia-Shigella	3.58667e-05	0.000358667	3.58667e-05	0	0.0003228	0.000358667	0	0.12392	0.00104013	0.0980237	0.0355798	0.0423586	0.062982	0.0367634	0.00209258
g__Anaeroplasma	0.000932535	0	0	0	0	0	0	0	0	0	0	0	0	0	0.391366
g__Butyricicoccus	0.000179334	0.00100427	0.000573868	0.000430401	0.000609734	0.00147054	0.000609734	0	0	0	0	0	0	0	0.00104229
g__Anaerofilum	0	0.000179334	7.17334e-05	3.58667e-05	7.17334e-05	7.17334e-05	0	0	0	0	0	0	0	0	0.0108729
g__Roseburia	0.0157096	0.027187	0.0257882	0.0259675	0.0213048	0.0168932	0.0166063	0	0	0	0	0	0	0	0.00105758
g__Desulfovibrio	0.000251067	7.17334e-05	0.00297694	7.17334e-05	0.00121947	0.000753201	0.0023672	0	0	0	0	0	0	0	0.00104229
g__Faecalibacterium	0	0	0.0002152	0	0	0	0	0	0	0	0	0	0	0	0.391366
g__Candidatus_Arthromitus	0	0	3.58667e-05	0	0.00143467	0	0	0	0	0	0	0	0	0	0.172955
g__Defluviitaleaceae_UCG-011	0	0	0	3.58667e-05	0.000645601	0	3.58667e-05	0	0	0	0	0	0	0	0.0747914
g__Ruminiclostridium_5	0.0225602	0.0248556	0.0299846	0.0185431	0.00552347	0.0226678	0.0420717	0.000753201	7.17334e-05	7.17334e-05	0.000538001	3.58667e-05	3.58667e-05	0.000358667	0.00211656
g__Intestinibacter	0	0	0	0	0	0	0	0	0	0	0	0	0	0	NA
g__Coriobacteriaceae_UCG-002	0	3.58667e-05	0.000573868	0	0	0	0	0.00211614	0.000179334	0.00272587	0.000394534	0.00477027	0.00566694	7.17334e-05	0.00606451
g__Allobaculum	0	0	0	0	0.00261827	0	0	0.00104013	7.17334e-05	0.00724508	0.0001076	0.00104013	0.000609734	3.58667e-05	0.0165423
g__Staphylococcus	7.17334e-05	0.000286934	3.58667e-05	0.0001076	3.58667e-05	0.0001076	0.0002152	0.000143467	3.58667e-05	0.00261827	0	3.58667e-05	7.17334e-05	0.0001076	0.649273
g__Parasutterella	0.000609734	0.000789068	0.0001076	7.17334e-05	0.000143467	0.000645601	3.58667e-05	0.000538001	0.0002152	0.000717334	0.000968401	0.0124099	0.0113339	0.000968401	0.0296623
g__Elusimicrobium	0	0	0	3.58667e-05	0.00104013	0	0	0	0	0	0	0	0	0	0.172955
g__Proteus	0	0.000179334	0	0	7.17334e-05	0.000179334	0	0	3.58667e-05	0	0.0001076	0	3.58667e-05	7.17334e-05	0.945402
g__Helcococcus	0	0	0	0	3.58667e-05	0	0	0	0	0	0	0	0	0	0.391366
g__Prevotella_9	3.58667e-05	0	0	0	0.217424	7.17334e-05	0	3.58667e-05	0	0.001614	0	0	0	3.58667e-05	0.886865
g__Prevotellaceae_UCG-001	0.000251067	0.000143467	0.0002152	3.58667e-05	0.000609734	0.000538001	0.000179334	0	0	0	0	0	0	0	0.00105758
g__Papillibacter	0.000251067	0.0013988	0	0.000251067	0.0001076	0.0017216	0.000394534	0	0	0	0	0	0	0	0.00367571
g__Lachnoclostridium	0.0513253	0.0375166	0.0152434	0.033105	0.00717334	0.0232058	0.0270794	0	0	0	0	0	7.17334e-05	0	0.00141376
g__Lachnospiraceae_NK4A136_group	0.105448	0.178114	0.304078	0.015889	0.0636276	0.0867257	0.0322442	0	0	0	0	0	0	0	0.00105758
g__Rothia	0.000179334	0.00175747	0.0001076	0.001076	0	0.00401707	0.000430401	0.0001076	7.17334e-05	0.000430401	0.000538001	0.0002152	0.000251067	0.000286934	0.521987
g__Ruminococcaceae_UCG-013	0.00638428	0.0170008	0.0024748	0.0199778	0.000251067	0.0128762	0.0280478	0	0	0	0	0	0	0	0.00105758
g__Lactococcus	0	0	0	0	0	0	0	0.000251067	0	0.000430401	0.0002152	3.58667e-05	3.58667e-05	3.58667e-05	0.00353895
g__Marvinbryantia	0.00111187	0.0018292	0.015064	0.0127327	0.00667121	0.00326387	0.0229906	0	0	0	0	0	0	0	0.00105758
g__Eubacterium_brachy_group	0.00261827	0.00286934	0.00218787	0.00355081	0.0001076	0.00136294	0.0023672	0	0	0	0	0	0	0	0.00105758
g__Coprococcus_2	0	0	0	0	0.0242459	0	0	0	0	0	0	0	0	0	0.391366
g__Facklamia	7.17334e-05	7.17334e-05	0	0	0	3.58667e-05	0	0	0	0	0	0	0	0	0.0747914
g__Odoribacter	0.000286934	3.58667e-05	0	7.17334e-05	0	0.0003228	0	0	0	0	0	0	0	0	0.0307212
g__Ornithinimicrobium	0	0	0	0	0	0	0	0	0	0	0	0	0	0	NA
g__Veillonella	0	0.0003228	3.58667e-05	0.0001076	0.000179334	0.000394534	7.17334e-05	0	0	0	0	0.000609734	0.0017216	3.58667e-05	0.395105
g__Ruminococcaceae_UCG-009	0.00208027	0.00111187	0.000573868	0.0001076	0.000681468	0.001614	0.000179334	0	0	0	0	0	0	0	0.00105758
g__Sellimonas	3.58667e-05	0	0	0.00154227	0.000466267	3.58667e-05	0.00240307	0	0	0	0	0	0	0	0.0112353
g__Ruminococcaceae_UCG-014	0.0172878	0.0130555	0.033643	0.017216	0.0401707	0.0228112	0.0252143	0	0	0	0	0	0	0	0.00105758
g__Ruminiclostridium_9	0.000645601	0.001076	0.000645601	0.000896668	0.00685054	0.00211614	0.0020444	0	0	0	0	0	0	0	0.00104229
g__Comamonas	0	0	0	0	0	0	0	0.000143467	0	3.58667e-05	0	0	0	3.58667e-05	0.0747914
g__Candidatus_Stoquefichus	0.000286934	0.000286934	3.58667e-05	0.000430401	0.000968401	0.000466267	0.0002152	0	0	0	0	0	0	0	0.00104229
g__Acetatifactor	7.17334e-05	0.000358667	0	0	0	0.000573868	0	0	0	0	0	0	0	0	0.0754126
g__Tyzzerella_3	0.000932535	0.00444747	0.0013988	0	7.17334e-05	0.0012912	0	0	0	0	0	0	0	0	0.0113573
g__Ruminiclostridium	3.58667e-05	0.0001076	0.0002152	0.0001076	0.00208027	0.000573868	0.000143467	0	0	0	0	0	0	0	0.00104229
C:control
I:IHLD
